# Supplementary material
Source: publisher figshare collection journal article supplement (https://frontiersin.figshare.com/ndownloader/files/36015035)
Supplement: Supplementary file [file 36015035]

**Research Topic: Structure-Function Metrology of Proteins.**

## **OOP-ESEEM Spectroscopy: Accuracies of Distances of Spin-correlated Radical Pairs in Biomolecules**

**Tarek Al Said, Stefan Weber, Erik Schleicher**

Institute of Physical Chemistry, University of Freiburg, Albertstr. 21, 79104 Freiburg, Germany

Phone: ++49(0)761 203-6204

Email: Erik.schleicher@pc.uni-freiburg.de

### **Supporting Information**

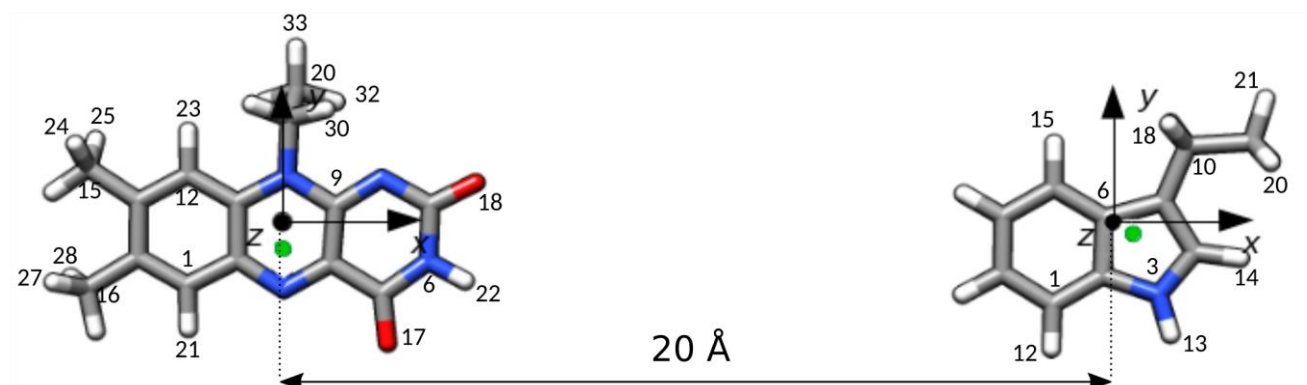

**Supporting Figure 1.** Comparison of center of mass (black dot) versus centers of electron spin density (green dot) of 1-ethyl-lumichrome (left) and tryptophan (right).  $\alpha$ ,  $\beta$ ,  $\gamma$  are the angles between the  $x$ ,  $y$ , and  $z$  axes of 1-ethyl-lumichrome and of tryptophan, respectively. The two coordinate systems are centered at the respective centers of masses. Please note that the numbering of the two molecules displayed is not in accordance with IUPAC, but as it is derived from the DFT calculations.

**Supporting Table 1.** Angle-dependent differences between the distance of the center of masses and the distance between the center of electron spin densities of 1-ethyl-lumichrome and tryptophan.

| Orientation<br>( $\alpha, \beta, \gamma$ ) / $^\circ$ | Distance between<br>the center of<br>masses /Å | Distance between<br>the centers of<br>electron spin<br>densities /Å |
|-------------------------------------------------------|------------------------------------------------|---------------------------------------------------------------------|
| (0, 0, 0)                                             | 20.00                                          | 20.49                                                               |
| (0, 90, 0)                                            | 20.00                                          | 20.02                                                               |
| (0, 180, 0)                                           | 20.00                                          | 19.56                                                               |
| (0, 0, 90)                                            | 20.00                                          | 19.97                                                               |
| (0, 0, 180)                                           | 20.00                                          | 19.56                                                               |
| (90, 0, 0)                                            | 20.00                                          | 20.49                                                               |
| (180, 0, 0)                                           | 20.00                                          | 20.49                                                               |

**Supporting Table 2.** Atomic coordinates and electron spin densities of geometry optimized 1-ethyl-lumichrome (in Å).

| Atom<br>number | Coordinates /Å |          |          | Mulliken<br>spin den-<br>sities |
|----------------|----------------|----------|----------|---------------------------------|
|                | <i>x</i>       | <i>y</i> | <i>z</i> |                                 |
| C1             | 1.22303        | -0.67407 | 0.00723  | 0.164615                        |
| C2             | 2.47850        | -0.01448 | 0.01839  | -0.068813                       |
| N3             | 3.61903        | -0.74756 | 0.01804  | 0.338606                        |
| C4             | 4.79244        | -0.06420 | 0.01802  | 0.117005                        |
| C5             | 6.05186        | -0.81114 | 0.00008  | 0.028781                        |
| N6             | 7.18068        | 0.02171  | -0.00087 | -0.005610                       |
| C7             | 7.22160        | 1.42819  | 0.01026  | 0.012111                        |
| N8             | 6.01792        | 2.08273  | 0.02254  | 0.009028                        |
| C9             | 4.89685        | 1.35970  | 0.03299  | 0.045522                        |
| N10            | 3.69485        | 2.08539  | 0.06320  | 0.095333                        |
| C11            | 2.46203        | 1.42287  | 0.02939  | 0.077926                        |
| C12            | 1.23574        | 2.09456  | 0.01099  | -0.030434                       |
| C13            | 0.00000        | 1.41206  | 0.00000  | 0.174636                        |
| C14            | 0.00000        | 0.00000  | 0.00000  | -0.064542                       |
| C15            | -1.27147       | 2.22821  | -0.00936 | -0.013991                       |
| C16            | -1.28429       | -0.80053 | -0.01058 | 0.004691                        |
| O17            | 6.18773        | -2.04195 | -0.01104 | 0.063648                        |
| O18            | 8.32385        | 1.99883  | 0.00561  | 0.039539                        |
| C19            | 3.75764        | 3.54540  | 0.12423  | -0.003425                       |
| C20            | 3.64455        | 4.21115  | -1.25088 | 0.005128                        |
| H21            | 1.25444        | -1.76558 | 0.00440  | -0.009385                       |
| H22            | 8.08036        | -0.45235 | -0.01405 | -0.000287                       |
| H23            | 1.21288        | 3.18503  | -0.00272 | 0.001271                        |
| H24            | -1.36360       | 2.84873  | 0.89861  | 0.009773                        |
| H25            | -1.30254       | 2.92104  | -0.86713 | 0.008776                        |
| H26            | -2.16857       | 1.59934  | -0.06505 | 0.000309                        |
| H27            | -1.90355       | -0.60746 | 0.88055  | -0.002492                       |
| H28            | -1.90951       | -0.57486 | -0.88976 | -0.002416                       |
| H29            | -1.06245       | -1.87571 | -0.03106 | -0.000397                       |
| H30            | 4.73036        | 3.78929  | 0.56657  | 0.000826                        |
| H31            | 2.96121        | 3.89194  | 0.80005  | 0.004282                        |
| H32            | 4.50431        | 3.92716  | -1.87161 | -0.000356                       |
| H33            | 3.64440        | 5.30655  | -1.14428 | 0.000629                        |
| H34            | 2.72370        | 3.91488  | -1.77147 | -0.000287                       |

**Supporting Table 3.** Atomic coordinates and electron spin densities of geometry optimized Tryptophan (in Å).

| Atom<br>number | Coordinates /Å |          |          | Mulliken<br>spin den-<br>sities |
|----------------|----------------|----------|----------|---------------------------------|
|                | <i>x</i>       | <i>y</i> | <i>z</i> |                                 |
| C1             | 21.20826       | -0.74164 | 0.00040  | 0.077371                        |
| C2             | 22.38372       | -0.01685 | 0.00107  | 0.010584                        |
| N3             | 23.71969       | -0.45863 | 0.00186  | 0.153078                        |
| C4             | 24.55240       | 0.59266  | 0.00231  | 0.179348                        |
| C5             | 23.79511       | 1.80727  | 0.00149  | 0.350242                        |
| C6             | 22.42010       | 1.40309  | 0.00099  | -0.080656                       |
| C7             | 21.20379       | 2.11609  | 0.00028  | 0.228855                        |
| C8             | 20.00000       | 1.39681  | -0.00000 | -0.062793                       |
| C9             | 20.00000       | 0.00000  | 0.00000  | 0.151013                        |
| C10            | 24.34776       | 3.18725  | -0.00006 | -0.018973                       |
| C11            | 25.87380       | 3.30011  | -0.00581 | 0.000251                        |
| H12            | 21.19258       | -1.83133 | 0.00026  | -0.003468                       |
| H13            | 24.01476       | -1.43240 | 0.00203  | -0.007763                       |
| H14            | 25.63000       | 0.46273  | 0.00319  | -0.009154                       |
| H15            | 21.19388       | 3.20593  | -0.00011 | -0.011374                       |
| H16            | 19.05270       | 1.93369  | -0.00037 | 0.002437                        |
| H17            | 19.05351       | -0.53946 | -0.00035 | -0.008009                       |
| H18            | 23.92763       | 3.72174  | 0.87191  | 0.024392                        |
| H19            | 23.92100       | 3.72156  | -0.86884 | 0.024265                        |
| H20            | 26.31883       | 2.84094  | 0.88712  | 0.000358                        |
| H21            | 26.17086       | 4.35501  | -0.01228 | -0.000364                       |
| H22            | 26.31238       | 2.83150  | -0.89711 | 0.000363                        |

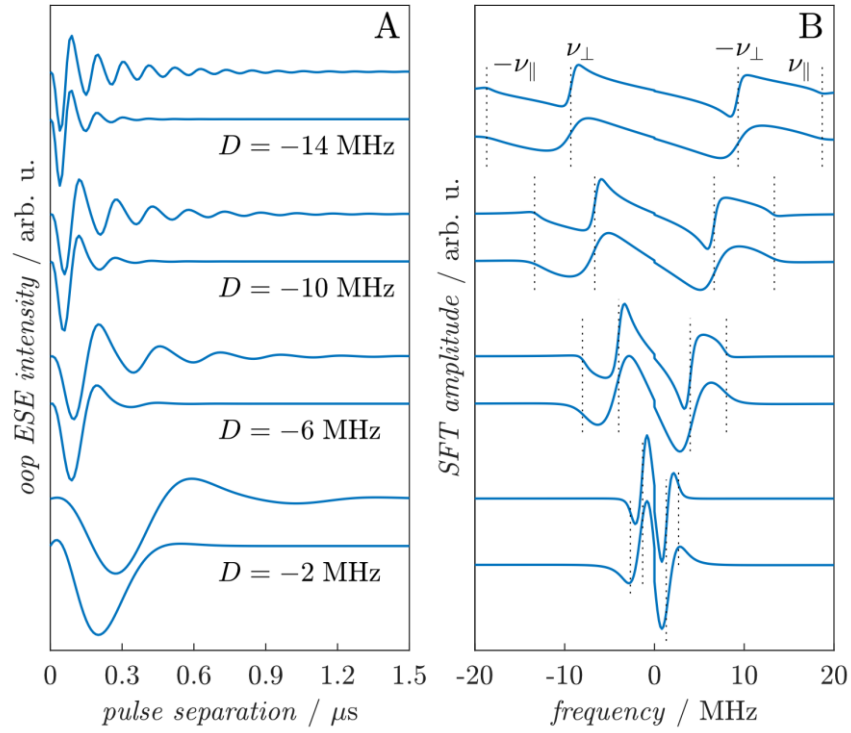

**Supporting Figure 2:** Influence of  $D$  values ( $J = 0.01$  MHz) on calculated OOP-ESEEM time traces (A) and corresponding SFT spectra (B). Two different relaxation times,  $0.35 \mu\text{s}$  (upper panels) and  $0.10 \mu\text{s}$  (lower panels), were used. The frequencies  $\nu_{\parallel}$  and  $\nu_{\perp}$  are shown as dotted lines. Other parameters as in the methods section.

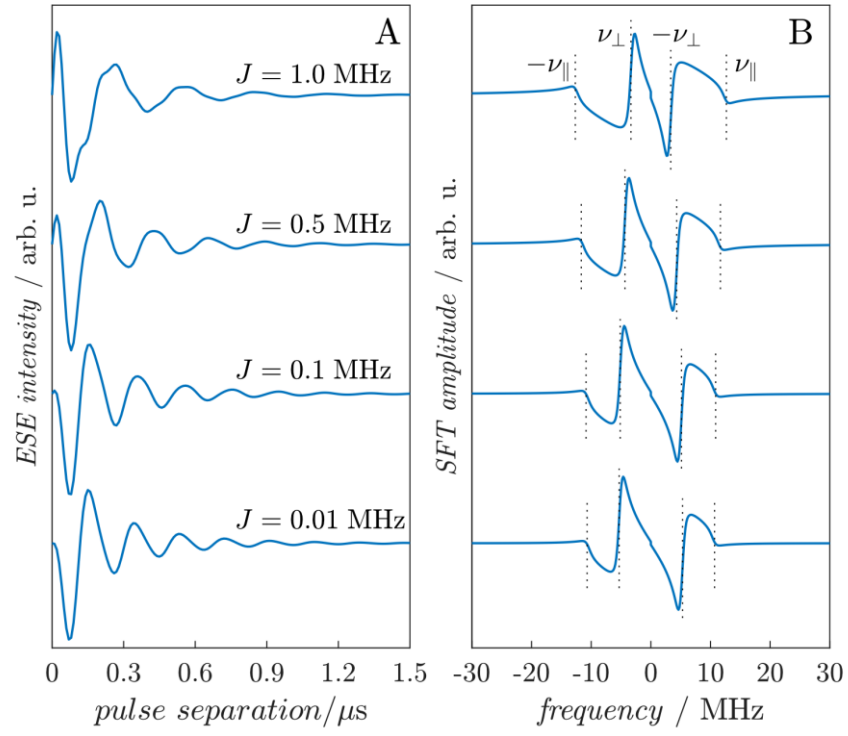

**Supporting Figure 3.** Influence of  $J$  values ( $D = -8 \text{ MHz}$ ) on calculated OOP-ESEEM time traces (A) and corresponding SFT spectra (B). The frequencies  $\nu_{\parallel}$  and  $\nu_{\perp}$  are shown as dotted lines. Other parameters as in the methods section.

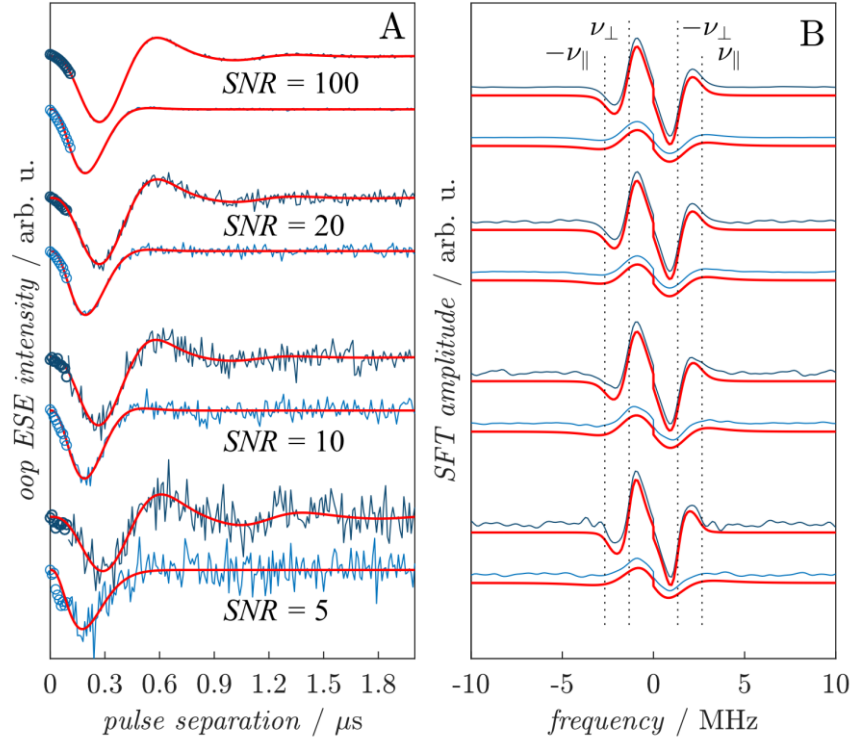

**Supporting Figure 4.** Influence of relaxation time and SNR on the quality of numerical simulations of calculated OOP-ESEEM time traces (A) and corresponding SFT spectra (B). Calculated time traces ( $D = -2.0$  MHz and  $J = 0$  MHz) with different SNRs including reconstruction with the AR model (blue circles), and two different relaxation times,  $T_d = 0.35$   $\mu\text{s}$  and  $T_d = 0.1$   $\mu\text{s}$ , are depicted in dark and light blue, respectively, results from numerical spectral simulations are depicted in red. The vertical dashed lines in the SFT spectra are the correct frequencies  $\nu_{\parallel}$  and  $\nu_{\perp}$ . Other simulation parameters are summarized in Table 4.

**Supporting Table 4.** Comparison of calculated OOP-ESEEM time traces from one  $D/J$  pair (SNR = 20), and results of numerical simulation using different start parameters. Starting parameters for  $T_d$  and  $H$  were 0.25  $\mu\text{s}$  and 1.0, respectively. Boundary conditions were set to:  $D = [-20,0]$  MHz (fit 3:  $D = [-30,0]$ ),  $J = [0,15]$  MHz,  $T_d = [0,10]$   $\mu\text{s}$  and,  $H = [0,\infty]$ . Distance  $r$  was calculated using the PDA. RSS: squared norm of the residual.

|                       | $D$ /MHz | $J$ /MHz    | $T_{\text{d}}$ / $\mu\text{s}$ | SNR      | $r$ / $\text{\AA}$   |                     |
|-----------------------|----------|-------------|--------------------------------|----------|----------------------|---------------------|
| Calculated parameters | −14.5    | 2.0         | 0.35                           | 20       | $r = \mathbf{17.52}$ |                     |
| Start parameters      |          | Fit results |                                |          | Distance from Eq. 3  |                     |
|                       | $D$ /MHz | $J$ /MHz    | $D$ /MHz                       | $J$ /MHz | RSS                  | $r$ / $\text{\AA}$  |
| Fit 1                 | −12.5    | 1.0         | −14.50(8)                      | 2.00(3)  | 27.2                 | $\mathbf{17.53(9)}$ |
| Fit 2                 | −11.5    | 1.0         | −11.52(7)                      | 1.00(2)  | 31.4                 | $\mathbf{18.9(1)}$  |
| Fit 3                 | −24.0    | 1.0         | −22.2(1)                       | 4.58(4)  | 45.6                 | $\mathbf{15.19(9)}$ |

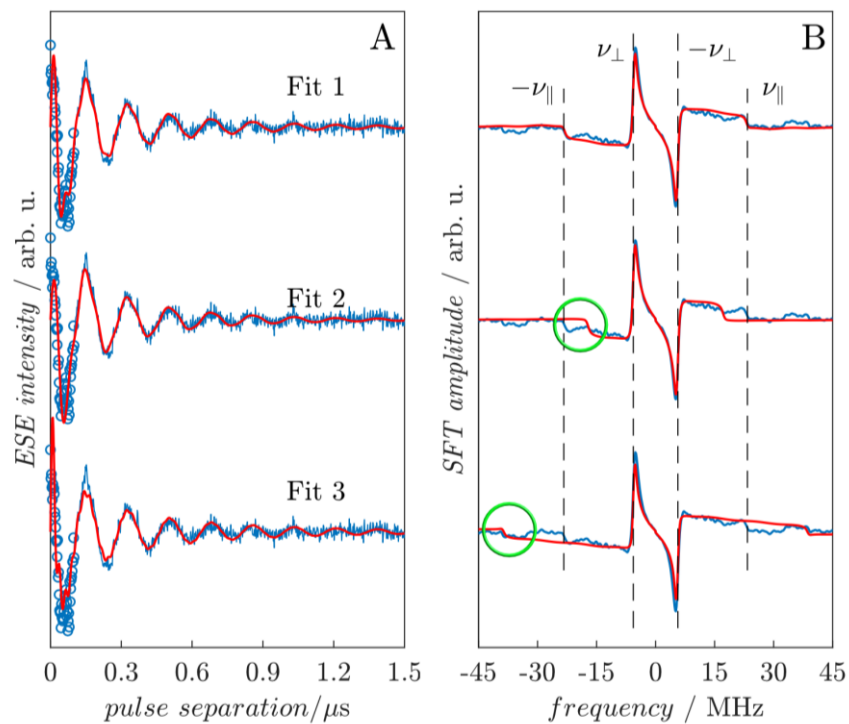

**Supporting Figure 5.** Influence of start parameters on the quality of numerical simulations of calculated OOP-ESEEM time traces (A) and corresponding SFT spectra (B). Calculated time traces including reconstruction with the AR model (blue circles) are depicted in blue, results from numerical spectral simulations are depicted in red. The vertical dashed lines in the SFT spectra are the correct frequencies  $\nu_{\parallel}$  and  $\nu_{\perp}$ , start parameters are summarized in Supporting Table 4. Differences between calculated and simulated  $\nu_{\parallel}$  values are highlighted in green.
